# Supplementary material for: Low-Dose Acetylsalicylic Acid Treatment in Non-Skull-Base Meningiomas: Impact on Tumor Proliferation and Seizure Burden
Source: MDPI journal article supplement (doi:10.3390/cancers14174285), 2022-09-01
Supplement: s1 [file s1]

# Tumor area in the prediction of baseline symptomatic epilepsy of non-skull base meningiomas

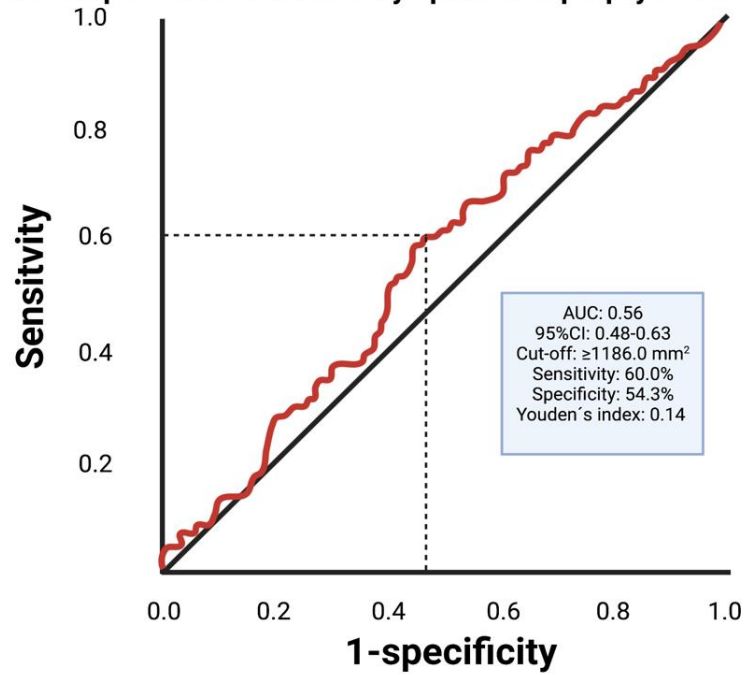

**Figure S1.** Receiver operating characteristic curve illustrating tumor area in the prediction of preoperative symptomatic epilepsy.

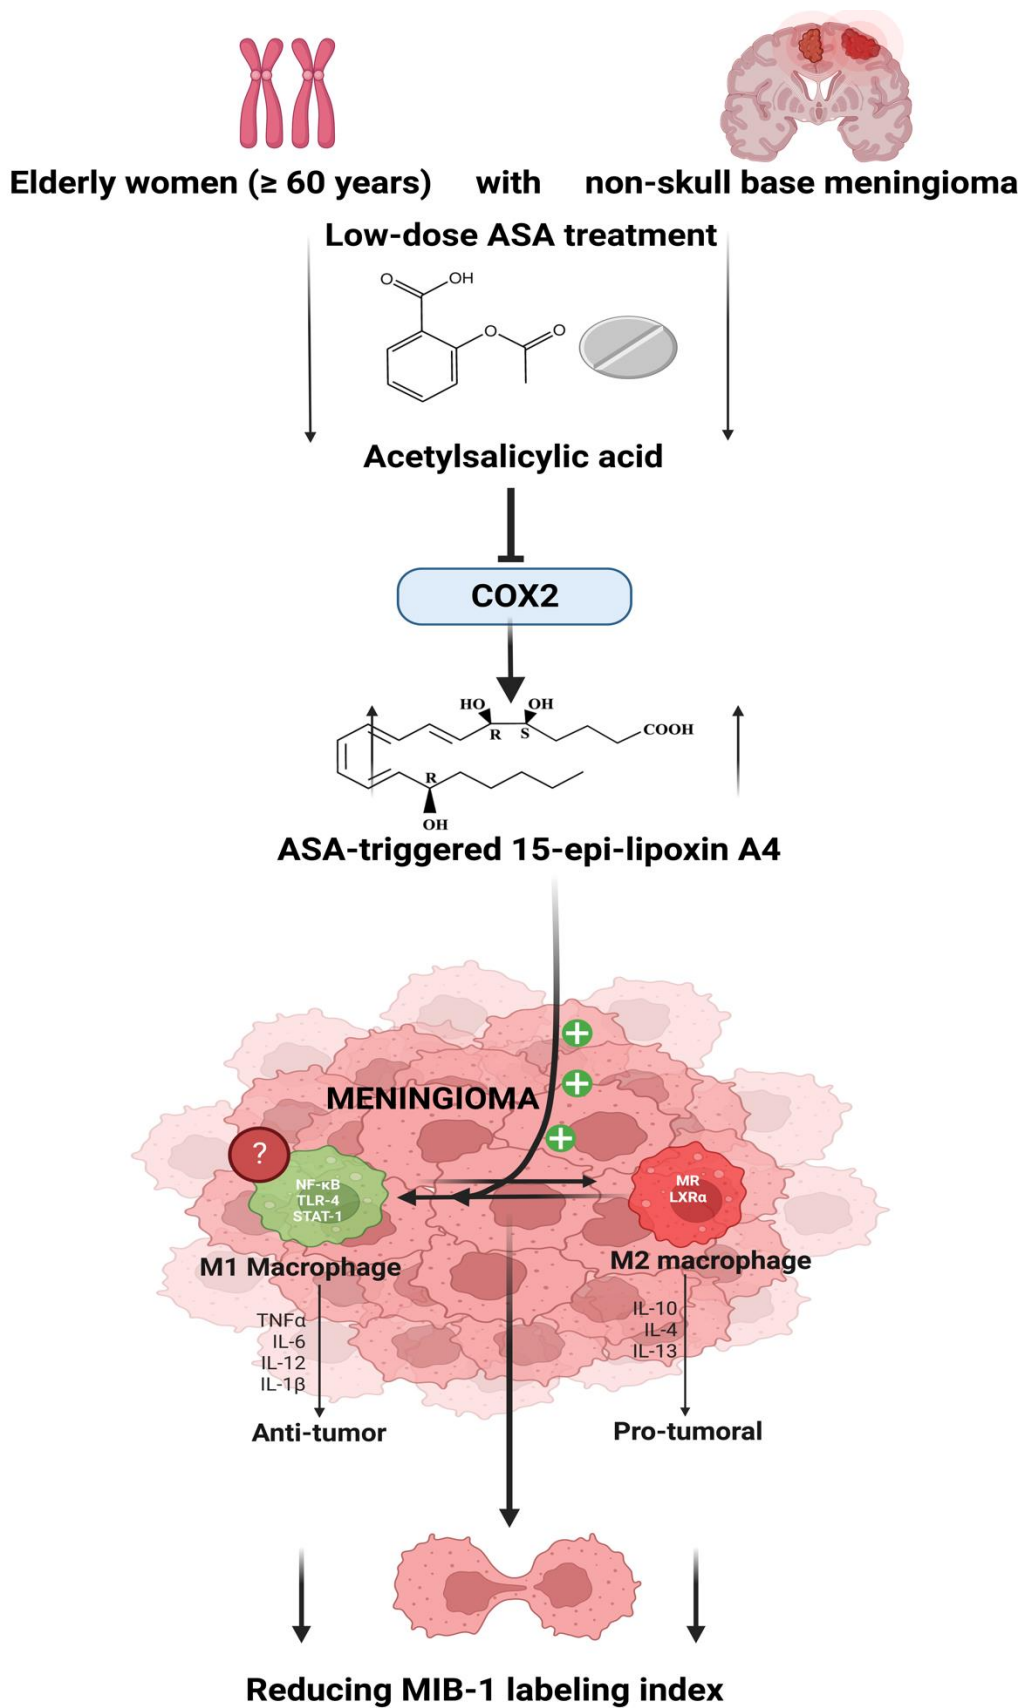

**Figure S2.** Reduction in MIB-1 labeling index in elderly female non-skull-base meningioma patients by low-dose ASA intake: Hypothesis of a potential pharmacological modulation inducing the formation of M1-phenotype macrophages by ASA-triggered 15-epi-lipoxin A4.
